# Supplementary material
Source: MDPI journal article supplement (https://www.mdpi.com/2073-4441/14/3/503)
Supplement: s1 [file s1 › water-1555776-supplementary.pdf]

## Supporting Information

### Degradation kinetics and disinfection by-product formation of iopromide during UV/chlorination and UV/persulfate oxidation

Chenyan Hu <sup>1,2</sup>, Qiangbing Wang <sup>1</sup>, Yi-Li Lin <sup>3,\*</sup>, Yeye Zhu <sup>1</sup>, Cun Xiong <sup>1</sup>, Dandan  
Huang <sup>1</sup> and Ling Xu <sup>1</sup>

1 College of Environmental and Chemical Engineering, Shanghai Engineering

Research Center of Ener-gy- Saving in Heat Exchange Systems, Shanghai

University of Electric Power, Shanghai, 200090, PR China;

huchenyan@126.com(C.Y. Hu); 18297422290@163.com(Q.B. Wang);

dflsz@outlook.com(Y.Y. Zhu); cunxinxiaoniu@163.com(C. Xiong);

2631356504@qq.com(D.D Huang); 2409784169@qq.com(L. Xu)

2 Shanghai Institute of Pollution Control and Ecological Security, Shanghai, 200092,

PR China

3 Department of Safety, Health and Environmental Engineering, National Kaohsiung

University of Science and Technology, Kaohsiung, 824, Taiwan, ROC

\* Correspondence: yililin@nkust.edu.tw (Y.L Lin)

This document contains one figure.

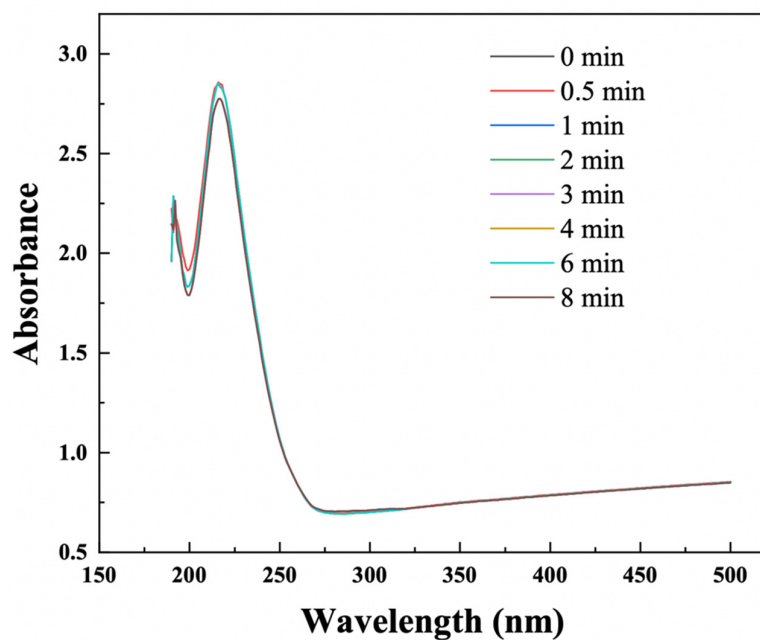

**Figure S1.** UV visible spectrum of iopromide degradation during chlorine.

$[\text{iopromide}]_0 = 10 \mu\text{M}$ ,  $[\text{HOCl}]_0 = 100 \mu\text{M}$ , UV intensity =  $1.12 \text{ mW/cm}^2$ ,

$[\text{phosphate buffer}]_0 = 10 \text{ mM}$ , pH = 7, and temperature =  $25^\circ\text{C}$ .
